# Supplementary material
Source: PubMed Central journal article supplement (PMC5317180)
Supplement: NIHMS850165-supplement-Supporting_Information.pdf [file NIHMS850165-supplement-Supporting_Information.pdf]

# Supporting Information

## Ambient Ionization and FAIMS Mass Spectrometry for Enhanced Imaging of Multiply Charged Molecular Ions in Biological Tissues

Clara L. Feider<sup>1</sup>, Natalia Elizondo<sup>1</sup>, and Livia S. Eberlin<sup>1\*</sup>

<sup>1</sup> Department of Chemistry, The University of Texas at Austin, Austin, TX, 78712

\* to whom correspondence may be addressed: [liviase@utexas.edu](mailto:liviase@utexas.edu)

### Table of Contents

**Supporting Figure 1.** ESI-FAIMS optimization for separation of lipids and metabolites.

**Supporting Figure 2.** Time-dependent decay plot for 6 second DESI acquisition.

**Supporting Table 1.** Summary of the cardiolipin species detected during DESI-MSI and DESI-FAIMS-MSI experiments.

**Supporting Figure 3.** MS/MS of representation cardiolipin species at  $m/z$  749.495.

**Supporting Figure 4.** DESI-MSI and DESI-FAIMS-MSI static imaging for CL of rat brain tissue.

**Supporting Table 2.** Summary of ganglioside species detected during DESI-MSI and DESI-FAIMS-MSI experiments.

**Supporting Figure 5.** MS/MS of representation ganglioside species at  $m/z$  1077.043.

**Supporting Figure 6.** Summary of protein species detected during LMJ-SSP-MS and LMJ-SSP-FAIMS-MS experiments on rat brain tissue.

**Supporting Figure 7.** MS/MS of rat ubiquitin.

**Supporting Table 3.** MS/MS fragments for rat ubiquitin.

**Supporting Figure 8.** MS/MS of rat thymosin  $\beta$ -4.

**Supporting Table 4.** MS/MS fragments for rat thymosin  $\beta$ -4.

**Supporting Figure 9.** MS/MS of rat hemoglobin  $\alpha$ -subunit.

**Supporting Table 5.** MS/MS fragments for rat hemoglobin  $\alpha$ -subunit.

**Supporting Figure 10.** MS/MS of human ubiquitin.

**Supporting Table 6.** MS/MS fragments for human ubiquitin.

**Supporting Figure 11.** MS/MS of human thymosin  $\beta$ -4.

**Supporting Table 7.** MS/MS fragments for human thymosin  $\beta$ -4.

**Supporting Figure 12.** MS/MS of human hemoglobin  $\alpha$ -subunit.

**Supporting Table 8.** MS/MS fragments for human hemoglobin  $\alpha$ -subunit.

**Supporting Figure 13.** LMJ-SSP and LMJ-SSP-FAIMS-MS protein ion image replicates.

**Supporting Figure 14.** LMJ-SSP-FAIMS-MS ion images of lipids and proteins of an unwashed rat brain tissue section.

**Supporting Figure 15.** Voxel versions of ion images displayed in the main article using the interpolate function.

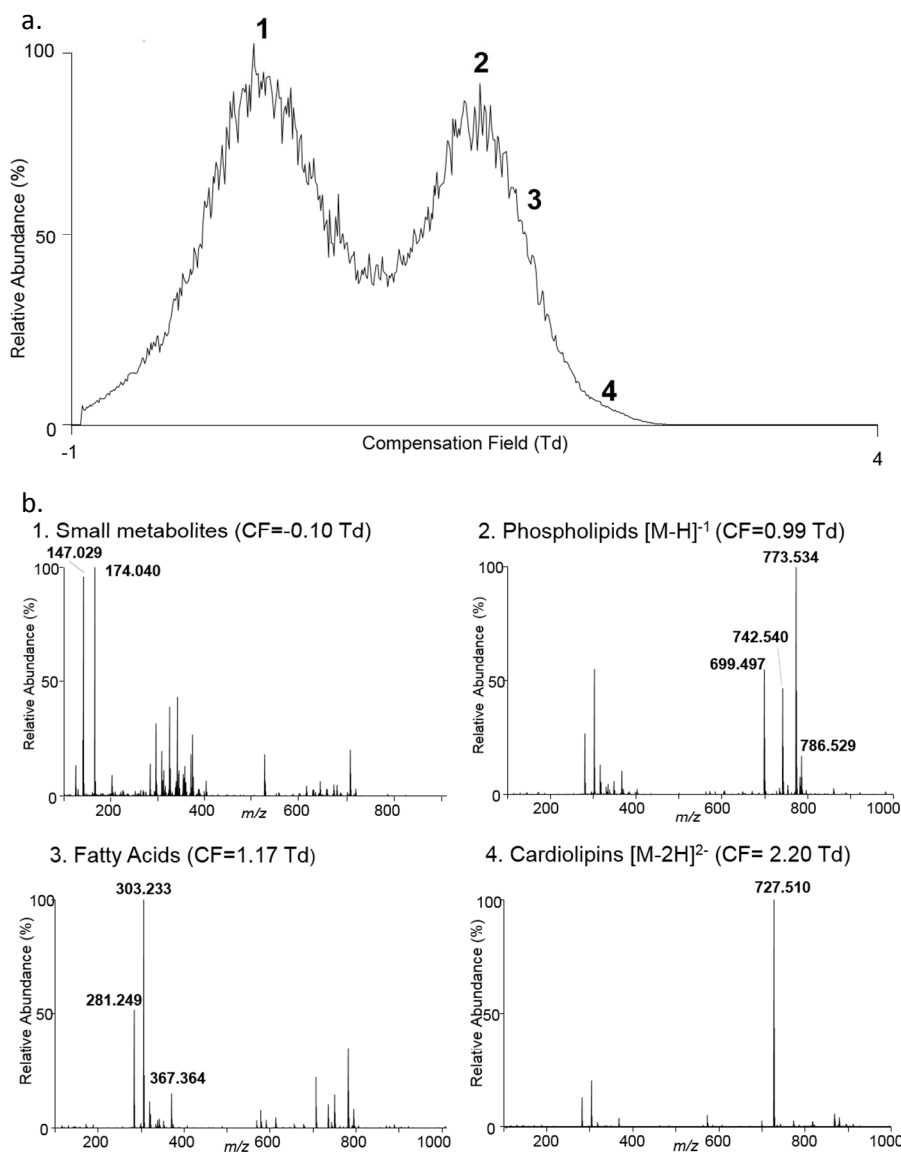

**Figure S1.** a) Chromatogram of a compensation field sweep (-1-4 Td) at a dispersion field of 220 Td, in which numbers annotating the peak field values for the transmission of different molecular classes of interest: metabolites, fatty acids, phospholipids, and doubly-charged

species, i.e. cardiolipin b) Spectra corresponding to the compensation field at which peak transmission of each molecular class.

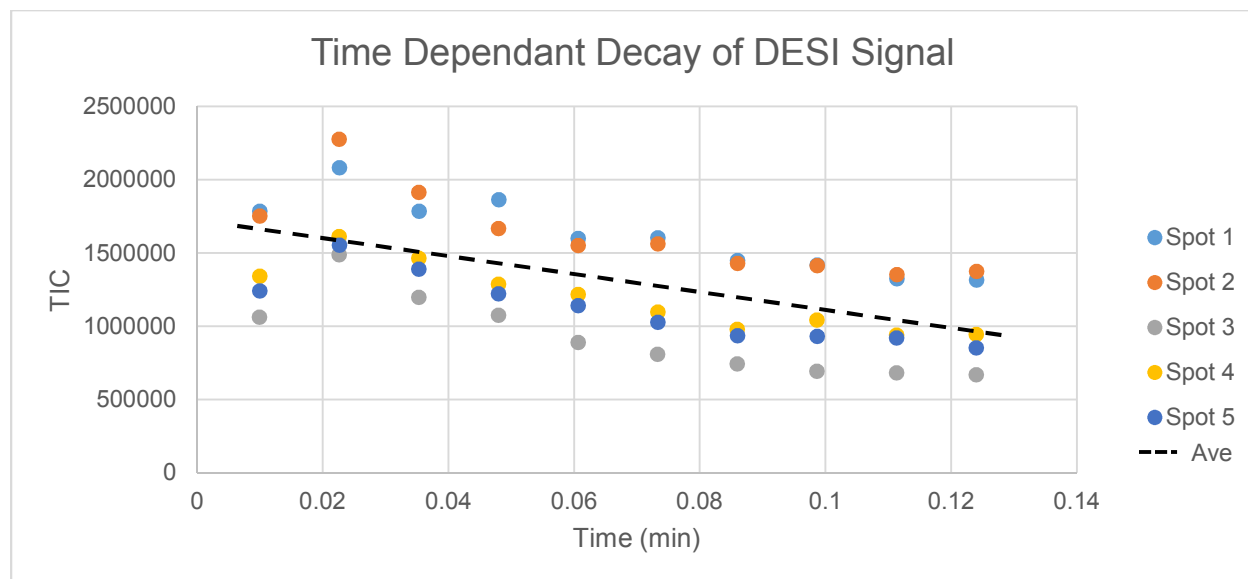

**Figure S2.** Time-dependent decay of DESI signal for analysis of five representative spots for 6 seconds (0.10 min) each, without FAIMS sweep, and an average trend line for the total loss in ion intensity throughout the scan.

**Table S1.** Representative CL species detected during DESI-MSI and FAIMS-DESI-MSI analysis of rat brain tissue.<sup>[a]</sup>

| Measured $m/z$ | Mass Error (ppm) <sup>[b]</sup> | Proposed Formula         |
|----------------|---------------------------------|--------------------------|
| 697.4654       | -3.15                           | $C_{77}H_{138}O_{17}P_2$ |
| 698.4718       | -1.15                           | $C_{77}H_{140}O_{17}P_2$ |
| 699.4803       | -2.14                           | $C_{77}H_{142}O_{17}P_2$ |
| 700.4885       | -2.57                           | $C_{77}H_{144}O_{17}P_2$ |
| 709.4647       | -2.11                           | $C_{79}H_{138}O_{17}P_2$ |
| 710.4727       | -2.39                           | $C_{79}H_{140}O_{17}P_2$ |
| 711.4796       | -1.12                           | $C_{79}H_{142}O_{17}P_2$ |
| 712.4876       | -1.26                           | $C_{79}H_{144}O_{17}P_2$ |
| 713.4955       | -1.40                           | $C_{79}H_{146}O_{17}P_2$ |
| 714.5012       | 1.54                            | $C_{79}H_{148}O_{17}P_2$ |
| 715.5065       | 5.59                            | $C_{79}H_{150}O_{17}P_2$ |
| 717.4803       | -2.09                           | $C_{80}H_{142}O_{17}P_2$ |
| 718.489        | -3.20                           | $C_{80}H_{144}O_{17}P_2$ |
| 719.4963       | -2.50                           | $C_{80}H_{146}O_{17}P_2$ |
| 720.5048       | -3.47                           | $C_{80}H_{148}O_{17}P_2$ |

|          |       |                                                                 |
|----------|-------|-----------------------------------------------------------------|
| 721.4654 | -3.05 | C <sub>81</sub> H <sub>138</sub> O <sub>17</sub> P <sub>2</sub> |
| 722.4727 | -2.35 | C <sub>81</sub> H <sub>140</sub> O <sub>17</sub> P <sub>2</sub> |
| 723.4806 | -2.49 | C <sub>81</sub> H <sub>142</sub> O <sub>17</sub> P <sub>2</sub> |
| 724.4878 | -1.52 | C <sub>81</sub> H <sub>144</sub> O <sub>17</sub> P <sub>2</sub> |
| 725.4943 | 0.28  | C <sub>81</sub> H <sub>146</sub> O <sub>17</sub> P <sub>2</sub> |
| 726.5029 | -0.83 | C <sub>81</sub> H <sub>148</sub> O <sub>17</sub> P <sub>2</sub> |
| 727.5103 | -0.27 | C <sub>81</sub> H <sub>150</sub> O <sub>17</sub> P <sub>2</sub> |
| 728.516  | 2.75  | C <sub>81</sub> H <sub>152</sub> O <sub>17</sub> P <sub>2</sub> |
| 729.4827 | -5.35 | C <sub>82</sub> H <sub>142</sub> O <sub>17</sub> P <sub>2</sub> |
| 729.5254 | 0.55  | C <sub>81</sub> H <sub>154</sub> O <sub>17</sub> P <sub>2</sub> |
| 730.4873 | 0.00  | C <sub>82</sub> H <sub>144</sub> O <sub>17</sub> P <sub>2</sub> |
| 731.4947 | -0.27 | C <sub>82</sub> H <sub>146</sub> O <sub>17</sub> P <sub>2</sub> |
| 733.4658 | -3.54 | C <sub>83</sub> H <sub>138</sub> O <sub>17</sub> P <sub>2</sub> |
| 734.4726 | -2.18 | C <sub>83</sub> H <sub>140</sub> O <sub>17</sub> P <sub>2</sub> |
| 735.4803 | -2.04 | C <sub>83</sub> H <sub>142</sub> O <sub>17</sub> P <sub>2</sub> |
| 736.4874 | -0.95 | C <sub>83</sub> H <sub>144</sub> O <sub>17</sub> P <sub>2</sub> |
| 737.4956 | -1.49 | C <sub>83</sub> H <sub>146</sub> O <sub>17</sub> P <sub>2</sub> |
| 738.5032 | -1.22 | C <sub>83</sub> H <sub>148</sub> O <sub>17</sub> P <sub>2</sub> |
| 739.5087 | 1.89  | C <sub>83</sub> H <sub>150</sub> O <sub>17</sub> P <sub>2</sub> |
| 740.5154 | 3.51  | C <sub>83</sub> H <sub>152</sub> O <sub>17</sub> P <sub>2</sub> |
| 741.5216 | 0.00  | C <sub>83</sub> H <sub>154</sub> O <sub>17</sub> P <sub>2</sub> |
| 742.4877 | -1.35 | C <sub>84</sub> H <sub>144</sub> O <sub>17</sub> P <sub>2</sub> |
| 746.4734 | -3.22 | C <sub>85</sub> H <sub>140</sub> O <sub>17</sub> P <sub>2</sub> |
| 747.4812 | -3.21 | C <sub>85</sub> H <sub>142</sub> O <sub>17</sub> P <sub>2</sub> |
| 748.4878 | -1.47 | C <sub>85</sub> H <sub>144</sub> O <sub>17</sub> P <sub>2</sub> |
| 749.4952 | -0.93 | C <sub>85</sub> H <sub>146</sub> O <sub>17</sub> P <sub>2</sub> |
| 750.502  | 0.40  | C <sub>85</sub> H <sub>148</sub> O <sub>17</sub> P <sub>2</sub> |
| 751.5093 | 1.06  | C <sub>85</sub> H <sub>150</sub> O <sub>17</sub> P <sub>2</sub> |
| 752.5164 | 2.13  | C <sub>85</sub> H <sub>152</sub> O <sub>17</sub> P <sub>2</sub> |
| 753.5249 | 1.19  | C <sub>85</sub> H <sub>154</sub> O <sub>17</sub> P <sub>2</sub> |
| 754.4879 | 0.00  | C <sub>86</sub> H <sub>144</sub> O <sub>17</sub> P <sub>2</sub> |
| 755.4946 | -0.13 | C <sub>86</sub> H <sub>146</sub> O <sub>17</sub> P <sub>2</sub> |
| 758.4722 | -1.58 | C <sub>87</sub> H <sub>140</sub> O <sub>17</sub> P <sub>2</sub> |
| 759.48   | -1.58 | C <sub>87</sub> H <sub>142</sub> O <sub>17</sub> P <sub>2</sub> |
| 760.4874 | -0.92 | C <sub>87</sub> H <sub>144</sub> O <sub>17</sub> P <sub>2</sub> |
| 761.4949 | -0.53 | C <sub>87</sub> H <sub>146</sub> O <sub>17</sub> P <sub>2</sub> |
| 762.5031 | -1.05 | C <sub>87</sub> H <sub>148</sub> O <sub>17</sub> P <sub>2</sub> |
| 763.5108 | -0.92 | C <sub>87</sub> H <sub>150</sub> O <sub>17</sub> P <sub>2</sub> |
| 764.5217 | -4.84 | C <sub>87</sub> H <sub>152</sub> O <sub>17</sub> P <sub>2</sub> |

|          |       |                                                                 |
|----------|-------|-----------------------------------------------------------------|
| 765.5277 | -2.48 | C <sub>87</sub> H <sub>154</sub> O <sub>17</sub> P <sub>2</sub> |
| 770.4733 | -2.99 | C <sub>89</sub> H <sub>140</sub> O <sub>17</sub> P <sub>2</sub> |
| 771.4806 | -2.33 | C <sub>89</sub> H <sub>142</sub> O <sub>17</sub> P <sub>2</sub> |
| 772.4886 | -2.46 | C <sub>89</sub> H <sub>144</sub> O <sub>17</sub> P <sub>2</sub> |
| 773.495  | -0.65 | C <sub>89</sub> H <sub>146</sub> O <sub>17</sub> P <sub>2</sub> |
| 774.5007 | 2.07  | C <sub>89</sub> H <sub>148</sub> O <sub>17</sub> P <sub>2</sub> |
| 775.5109 | -1.03 | C <sub>89</sub> H <sub>150</sub> O <sub>17</sub> P <sub>2</sub> |
| 776.5178 | 0.26  | C <sub>89</sub> H <sub>152</sub> O <sub>17</sub> P <sub>2</sub> |
| 777.5264 | -0.77 | C <sub>89</sub> H <sub>154</sub> O <sub>17</sub> P <sub>2</sub> |
| 783.4798 | -1.28 | C <sub>91</sub> H <sub>142</sub> O <sub>17</sub> P <sub>2</sub> |
| 784.4882 | -1.91 | C <sub>91</sub> H <sub>144</sub> O <sub>17</sub> P <sub>2</sub> |
| 785.4935 | 1.27  | C <sub>91</sub> H <sub>146</sub> O <sub>17</sub> P <sub>2</sub> |
| 786.4991 | 4.07  | C <sub>91</sub> H <sub>148</sub> O <sub>17</sub> P <sub>2</sub> |
| 795.4814 | -3.27 | C <sub>93</sub> H <sub>142</sub> O <sub>17</sub> P <sub>2</sub> |
| 796.4873 | -0.75 | C <sub>93</sub> H <sub>144</sub> O <sub>17</sub> P <sub>2</sub> |
| 797.4937 | 1.00  | C <sub>93</sub> H <sub>146</sub> O <sub>17</sub> P <sub>2</sub> |
| 798.4994 | 3.63  | C <sub>93</sub> H <sub>148</sub> O <sub>17</sub> P <sub>2</sub> |

<sup>[a]</sup> Red text denotes species that were only detectable with the addition of FAIMS with DESI-MSI

<sup>[b]</sup> Calculated based on the exact monoisotopic *m/z* of the deprotonated molecular ion.

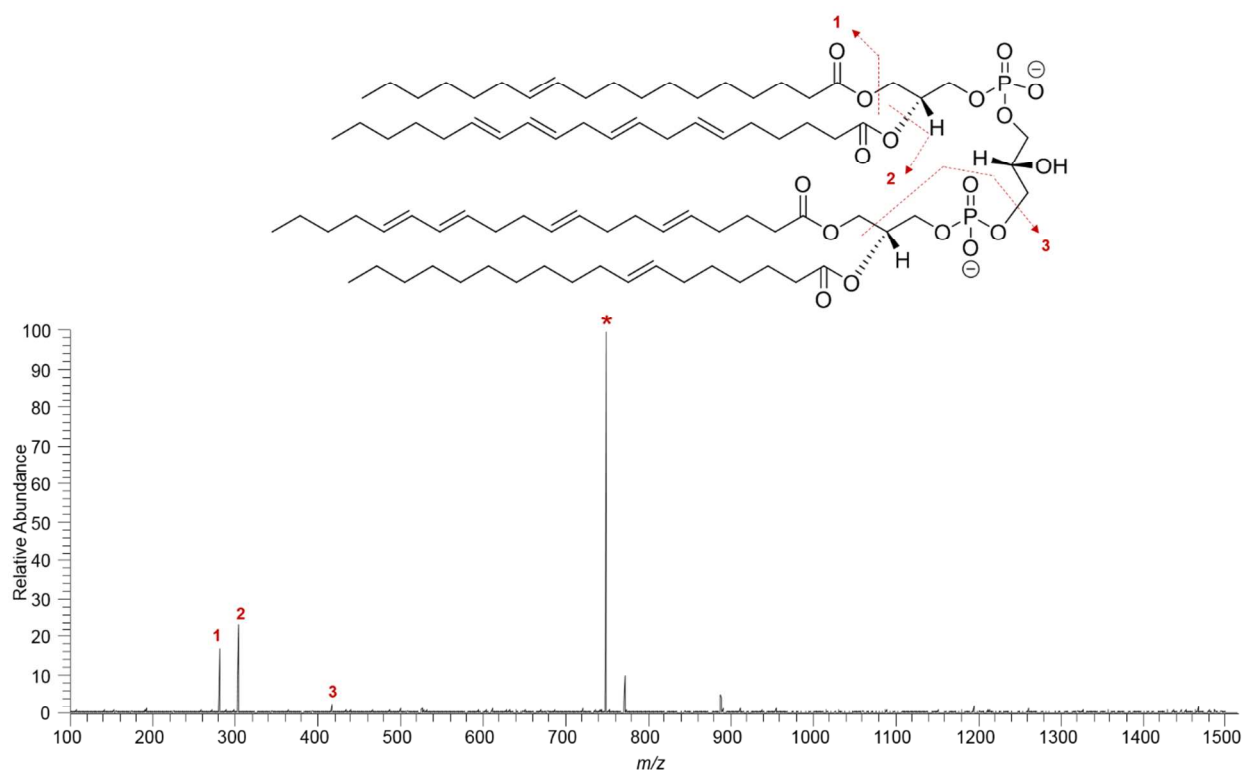

**Figure S3.** MSMS of  $m/z$  749.495, identified at CL (20:4/20:4/20:4/18:1)

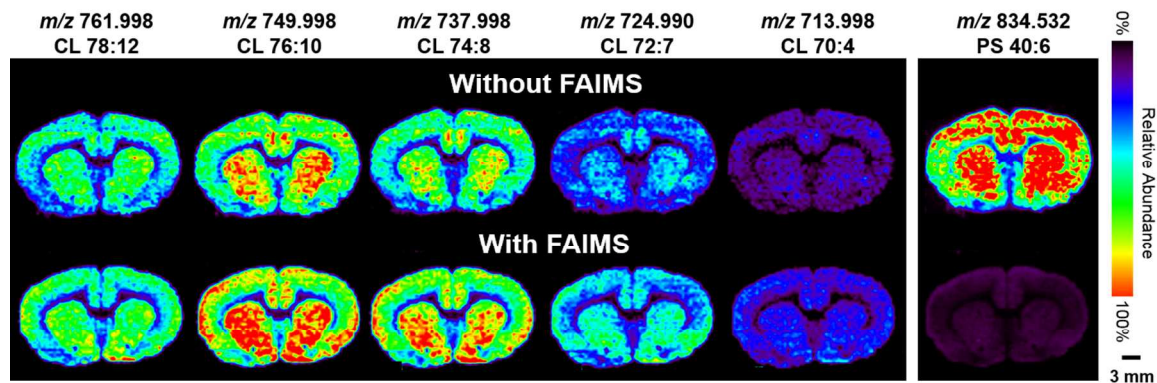

**Figure S4.** DESI-MS and DESI-FAIMS-MS ion images of rat brain tissue for five representative CL species, compared to another representative lipid species, to show increase in relative abundance of CLs associated with FAIMS selective imaging. Scale bar= 3mm

**Table S2.** Representative ganglioside species detected during DESI-MSI and FAIMS-DESI-MSI analysis of rat brain tissue and identified using high mass accuracy and tandem MS analyses.<sup>[a]</sup>

| Measured $m/z$ | Tentative Attribution <sup>[b]</sup> | Mass Error (ppm) <sup>[c]</sup> | Proposed Formula |
|----------------|--------------------------------------|---------------------------------|------------------|
|----------------|--------------------------------------|---------------------------------|------------------|

|           |                                                    |       |                                                                 |
|-----------|----------------------------------------------------|-------|-----------------------------------------------------------------|
| 917.4798  | GD1 d36:2 [M-2H] <sup>2-</sup>                     | -1.09 | C <sub>84</sub> H <sub>148</sub> N <sub>4</sub> O <sub>39</sub> |
| 918.4832  | GD1 d36:1 [M-2H] <sup>2-</sup>                     | 3.70  | C <sub>84</sub> H <sub>150</sub> N <sub>4</sub> O <sub>39</sub> |
| 919.4886  | GD1 d36:1 [M-2H] <sup>2-</sup>                     | 6.31  | C <sub>84</sub> H <sub>152</sub> N <sub>4</sub> O <sub>39</sub> |
| 931.4957  | GD1 d38:1 [M-2H] <sup>2-</sup>                     | -1.40 | C <sub>86</sub> H <sub>152</sub> N <sub>4</sub> O <sub>39</sub> |
| 932.4993  | GD1 d38:0 [M-2H] <sup>2-</sup>                     | 3.11  | C <sub>86</sub> H <sub>154</sub> N <sub>4</sub> O <sub>39</sub> |
| 952.5009  | Acetylated GD1b d38:1 [M-2H] <sup>2-</sup>         | -1.26 | C <sub>88</sub> H <sub>154</sub> N <sub>4</sub> O <sub>40</sub> |
| 1063.0278 | GT1 d36:1 [M-2H] <sup>2-</sup>                     | -1.22 | C <sub>95</sub> H <sub>167</sub> N <sub>5</sub> O <sub>47</sub> |
| 1064.0313 | GT1 d36:0 [M-2H] <sup>2-</sup>                     | 2.82  | C <sub>95</sub> H <sub>167</sub> N <sub>5</sub> O <sub>47</sub> |
| 1073.0093 | GT1 d38:4 [M-2H] <sup>2-</sup>                     | 1.40  | C <sub>97</sub> H <sub>161</sub> N <sub>5</sub> O <sub>47</sub> |
| 1074.0175 | GT1 d38:3 [M-2H] <sup>2-</sup>                     | 1.02  | C <sub>97</sub> H <sub>163</sub> N <sub>5</sub> O <sub>47</sub> |
| 1075.0205 | GT1 d38:2 [M-2H] <sup>2-</sup>                     | 5.58  | C <sub>97</sub> H <sub>165</sub> N <sub>5</sub> O <sub>47</sub> |
| 1077.0433 | GT1 d38:1 [M-2H] <sup>2-</sup>                     | -1.11 | C <sub>97</sub> H <sub>169</sub> N <sub>5</sub> O <sub>47</sub> |
| 1078.0454 | GT1 d38:0 [M-2H] <sup>2-</sup>                     | 4.17  | C <sub>97</sub> H <sub>171</sub> N <sub>5</sub> O <sub>47</sub> |
| 1082.0055 | GT1 d36:1- Potassium adduct [M-3H+K] <sup>2-</sup> | -1.02 | C <sub>95</sub> H <sub>165</sub> N <sub>5</sub> O <sub>47</sub> |
| 1083.0168 | GT1 d36:0- Potassium adduct [M-3H+K] <sup>2-</sup> | -4.25 | C <sub>95</sub> H <sub>167</sub> N <sub>5</sub> O <sub>47</sub> |
| 1084.0323 | Acetylated GT1 d36:1 [M-2H] <sup>2-</sup>          | -0.55 | C <sub>97</sub> H <sub>165</sub> N <sub>5</sub> O <sub>48</sub> |
| 1085.0360 | Acetylated GT1 d36:0 [M-2H] <sup>2-</sup>          | 3.32  | C <sub>97</sub> H <sub>167</sub> N <sub>5</sub> O <sub>48</sub> |
| 1096.0210 | GT1 d38:1- Potassium adduct [M-3H+K] <sup>2-</sup> | -0.82 | C <sub>97</sub> H <sub>169</sub> N <sub>5</sub> O <sub>47</sub> |
| 1097.0294 | GT1 d38:0- Potassium adduct [M-3H+K] <sup>2-</sup> | -1.37 | C <sub>97</sub> H <sub>171</sub> N <sub>5</sub> O <sub>47</sub> |
| 1098.0490 | Acetylated GT1 d38:1 [M-2H] <sup>2-</sup>          | -1.46 | C <sub>99</sub> H <sub>169</sub> N <sub>5</sub> O <sub>48</sub> |
| 1099.0496 | Acetylated GT1 d38:0 [M-2H] <sup>2-</sup>          | 5.10  | C <sub>99</sub> H <sub>171</sub> N <sub>5</sub> O <sub>48</sub> |

<sup>[a]</sup> Red text denotes species that were only detectable with the addition of FAIMS with DESI-MSI

<sup>[b]</sup> (X:Y) denotes the total number of carbons and doubles bonds within the steric acid and sphingosine chains

<sup>[c]</sup> Calculated based on the exact monoisotopic *m/z* of the deprotonated molecular ion.

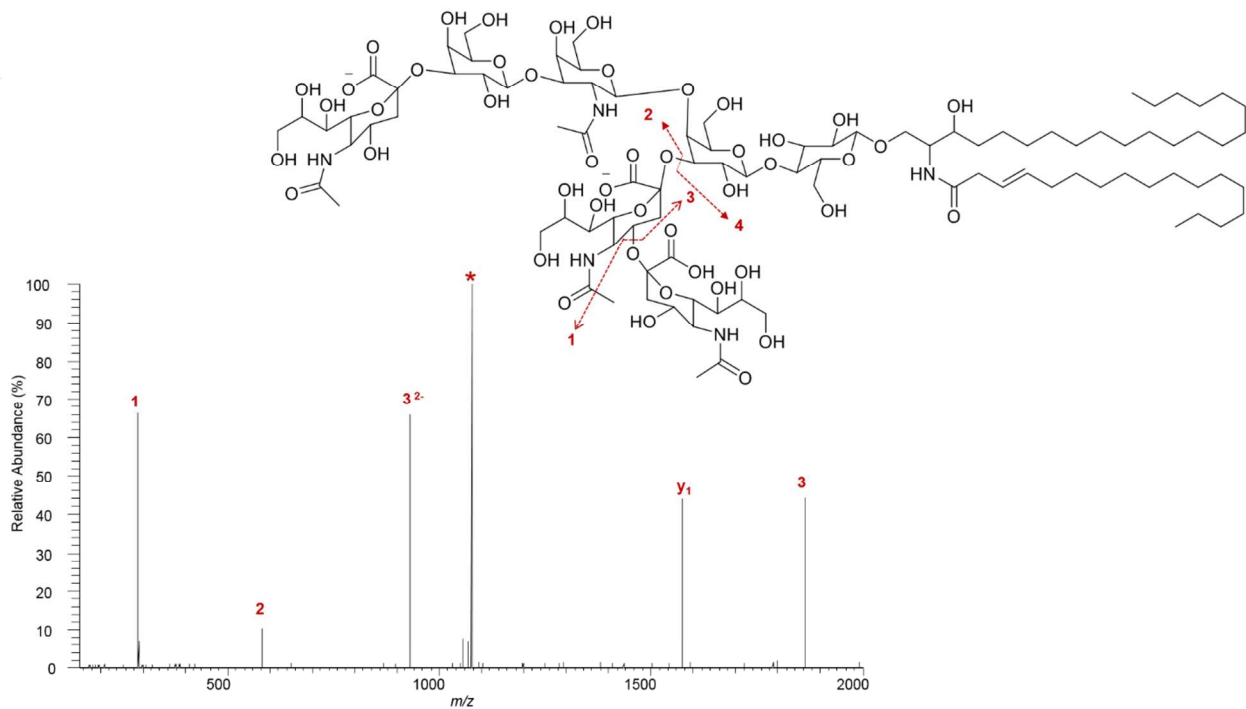

**Figure S5.** MSMS of  $m/z$  1077.043, identified at GT1 d38:1 ganglioside

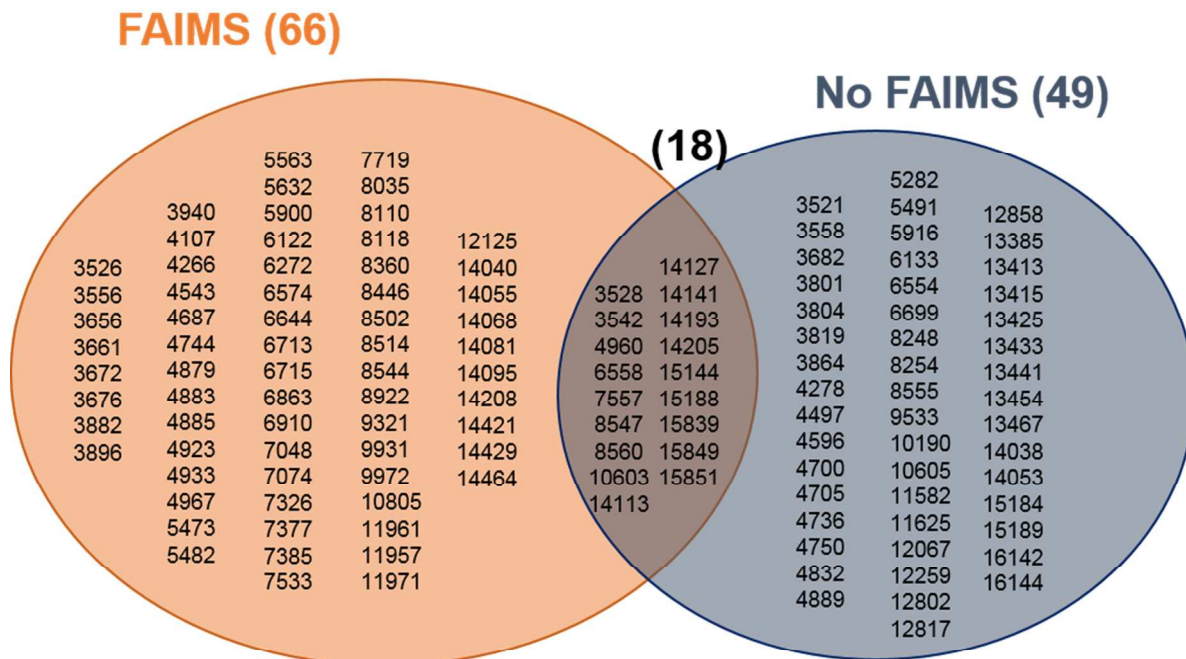

**Figure S6.** Molecular weights of all protein, proteoforms and protein fragment species detected during LMJ-SSP-MS and LMJ-SSP-FAIMS-MS profiling experiments of a rat brain tissue sections.



N M Q I F V K T L T G K T I T L E V E P L S D T I I E N 25  
 26 V K A K I Q D K E G I P P D Q Q R L I F A G K Q L 50  
 51 E D G R T L S D Y N I Q K E S T L H L V L R L R G 75  
 76 G C

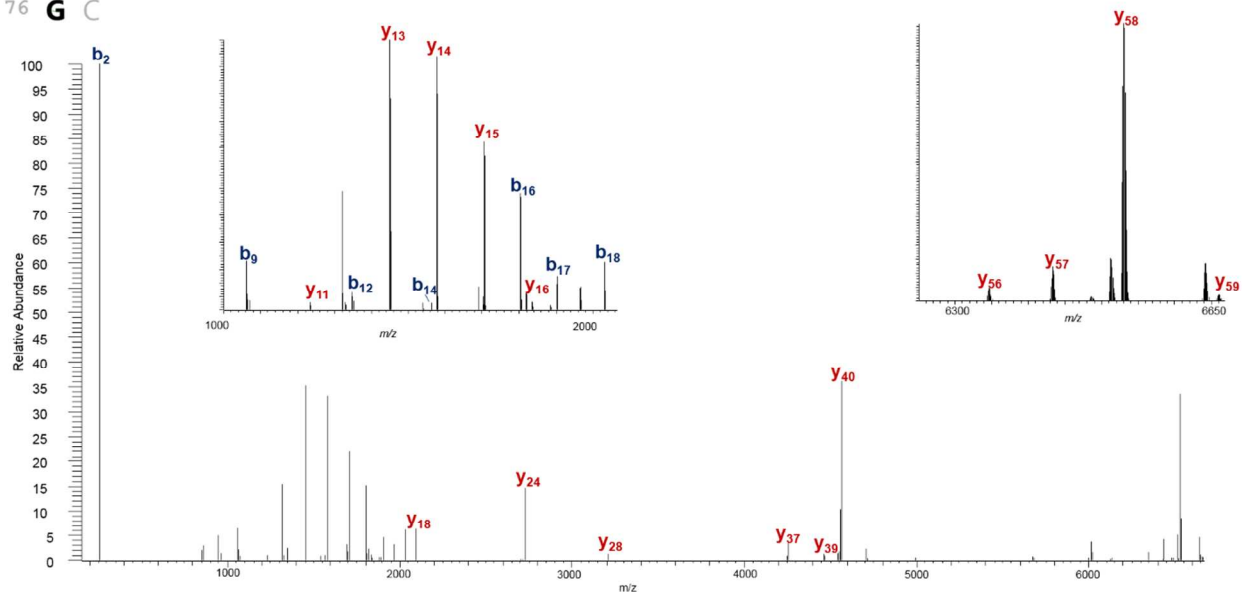

|                     |         |
|---------------------|---------|
| PCS                 | 560.77  |
| P-Score             | 4.1E-51 |
| Fragments Explained | 51%     |
| Residue Cleavages   | 32%     |

**Figure S7.** MS/MS of ion cluster at  $m/z$  857.46 from a rat brain tissue section, identified at ubiquitin. The sequence coverage map of the fragments compared to the sequence of rat ubiquitin is shown, as well as the ProSight Lite scores.

**Table S3.** Matching fragment ions identified from MS/MS of ion  $m/z$  857.46 compared with the sequence of rat ubiquitin.

| Name | Ion Type | Theoretical Mass <sup>[a]</sup> | Observed Mass <sup>[a]</sup> | Mass Difference (Da) | Mass Difference (ppm) |
|------|----------|---------------------------------|------------------------------|----------------------|-----------------------|
| B2   | B        | 259.09907                       | 259.097903                   | -0.001167            | -4.504068656          |
| B9   | B        | 1061.59433                      | 1061.589782                  | -0.004548            | -4.284122354          |
| B12  | B        | 1347.75843                      | 1347.752456                  | -0.005974            | -4.432545081          |
| B14  | B        | 1561.89017                      | 1561.889998                  | -0.000172            | -0.11012298           |
| B16  | B        | 1804.01682                      | 1804.010171                  | -0.006649            | -3.685664083          |
| B17  | B        | 1903.08523                      | 1903.079469                  | -0.005761            | -3.027189696          |
| B18  | B        | 2032.12782                      | 2032.118804                  | -0.009016            | -4.436728788          |
| Y11  | Y        | 1233.766945                     | 1233.761436                  | -0.005509            | -4.465186899          |
| Y12  | Y        | 1320.798975                     | 1320.79362                   | -0.005355            | -4.05436414           |
| Y13  | Y        | 1449.841565                     | 1449.836181                  | -0.005384            | -3.713509207          |
| Y14  | Y        | 1577.936525                     | 1577.930363                  | -0.006162            | -3.905100048          |
| Y15  | Y        | 1705.995105                     | 1705.988989                  | -0.006116            | -3.585004425          |
| Y16  | Y        | 1819.079165                     | 1819.072672                  | -0.006493            | -3.569388361          |
| Y18  | Y        | 2096.185425                     | 2096.176443                  | -0.008982            | -4.284926273          |
| Y24  | Y        | 2725.498705                     | 2725.485762                  | -0.012943            | -4.748855678          |
| Y28  | Y        | 3210.710875                     | 3210.694521                  | -0.016354            | -5.093576045          |
| Y37  | Y        | 4252.319205                     | 4252.300703                  | -0.018502            | -4.351037424          |
| Y39  | Y        | 4464.398905                     | 4464.380932                  | -0.017973            | -4.025849926          |
| Y40  | Y        | 4561.451665                     | 4561.434382                  | -0.017283            | -3.788925384          |
| Y44  | Y        | 4988.694735                     | 4988.676274                  | -0.018461            | -3.700567178          |
| Y53  | Y        | 6014.245275                     | 6014.226124                  | -0.019151            | -3.184273192          |
| Y54  | Y        | 6127.329335                     | 6127.303402                  | -0.025933            | -4.232349623          |
| Y56  | Y        | 6343.403955                     | 6343.374982                  | -0.028973            | -4.567421562          |
| Y57  | Y        | 6430.435985                     | 6430.386656                  | -0.049329            | -7.671175036          |
| Y58  | Y        | 6527.488745                     | 6527.470469                  | -0.018276            | -2.79985163           |
| Y59  | Y        | 6656.531335                     | 6656.502773                  | -0.028562            | -4.290823338          |

[a] Calculated based on monoisotopic masses

N **S** D[K] P D M A E I E K[F] D[K] S K L K[K] T E T Q E[K] 25  
 26 [N] P L P S K E T I I E Q E K Q A G E I S C

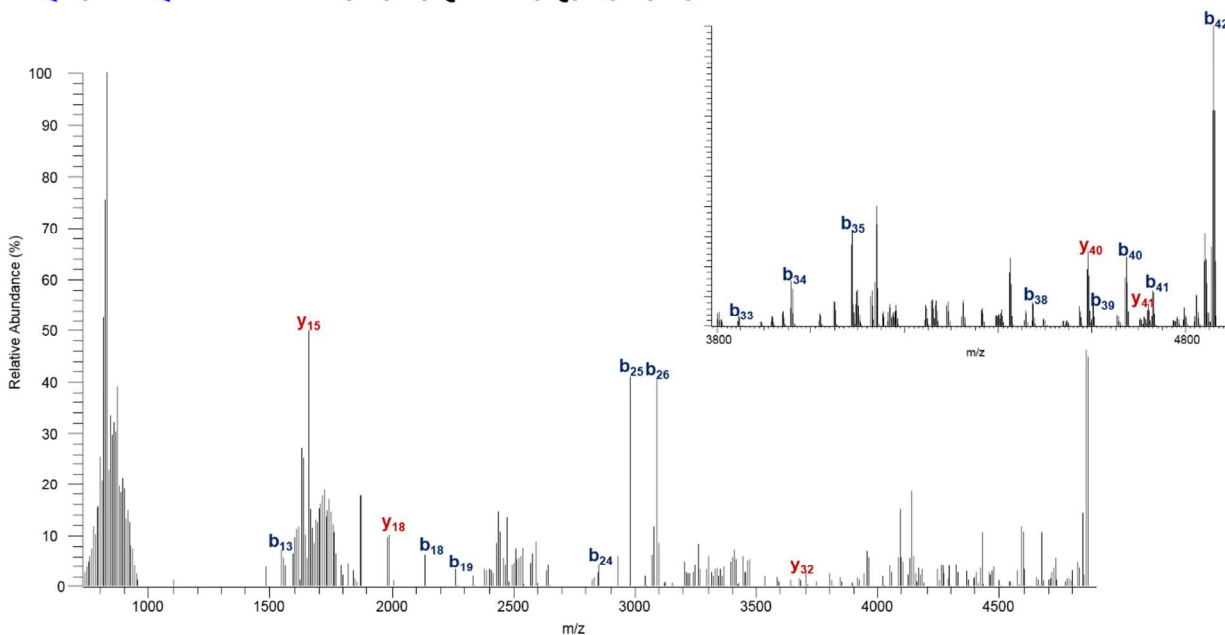

|                            |                |
|----------------------------|----------------|
| <b>PCS</b>                 | <b>110.46</b>  |
| <b>P-score</b>             | <b>8.6E-15</b> |
| <b>Fragments Explained</b> | <b>2%</b>      |
| <b>Residue Cleavages</b>   | <b>43%</b>     |

**Figure S8.** MS/MS of ion cluster at  $m/z$  828.06 from a rat brain tissue section, identified as thymosin  $\beta$ -4. The sequence coverage map of the fragments compared to the sequence of rat thymosin  $\beta$ -4 is shown, as well as the ProSight Lite scores. The red highlight indicates an acylation.

**Table S4.** Matching fragment ions identified from MS/MS of ion  $m/z$  828.09 compared with the sequence of rat thymosin  $\beta$ -4.

| Name | Ion Type | Theoretical Mass <sup>[a]</sup> | Observed Mass <sup>[a]</sup> | Mass Difference (Da) | Mass Difference (ppm) |
|------|----------|---------------------------------|------------------------------|----------------------|-----------------------|
| B13  | B        | 1547.681345                     | 1547.679601                  | -0.001744467         | -1.127148612          |
| B18  | B        | 2132.082315                     | 2132.07922                   | -0.003095467         | -1.451851487          |
| B19  | B        | 2260.177275                     | 2260.172114                  | -0.005161467         | -2.283655772          |
| B24  | B        | 2848.416395                     | 2848.414334                  | -0.002061467         | -0.72372385           |
| B25  | B        | 2976.511355                     | 2976.507654                  | -0.003701467         | -1.243558797          |
| B26  | B        | 3090.554285                     | 3090.550168                  | -0.004117467         | -1.332274569          |
| B33  | B        | 3842.961125                     | 3842.952632                  | -0.008493467         | -2.210136039          |
| B34  | B        | 3956.045185                     | 3956.039649                  | -0.005536467         | -1.39949536           |
| B35  | B        | 4085.087775                     | 4085.072164                  | -0.015611467         | -3.821574404          |
| B38  | B        | 4470.283905                     | 4470.275728                  | -0.008177467         | -1.82929475           |
| B39  | B        | 4598.342485                     | 4598.337145                  | -0.005340467         | -1.161389544          |
| B40  | B        | 4669.379595                     | 4669.369511                  | -0.010084467         | -2.159701664          |
| B41  | B        | 4726.401055                     | 4726.387793                  | -0.013262467         | -2.806039252          |
| B42  | B        | 4855.443645                     | 4855.440068                  | -0.003577467         | -0.736795058          |
| Y15  | Y        | 1659.795135                     | 1659.792623                  | -0.002512467         | -1.513721077          |
| Y18  | Y        | 1983.974885                     | 1983.973092                  | -0.001793467         | -0.903976604          |
| Y32  | Y        | 3674.900245                     | 3674.894573                  | -0.005672467         | -1.543570302          |
| Y40  | Y        | 4588.321745                     | 4588.314041                  | -0.007704467         | -1.679147041          |
| Y41  | Y        | 4716.416705                     | 4716.410236                  | -0.006469467         | -1.371691113          |

[a] Calculated based on monoisotopic masses

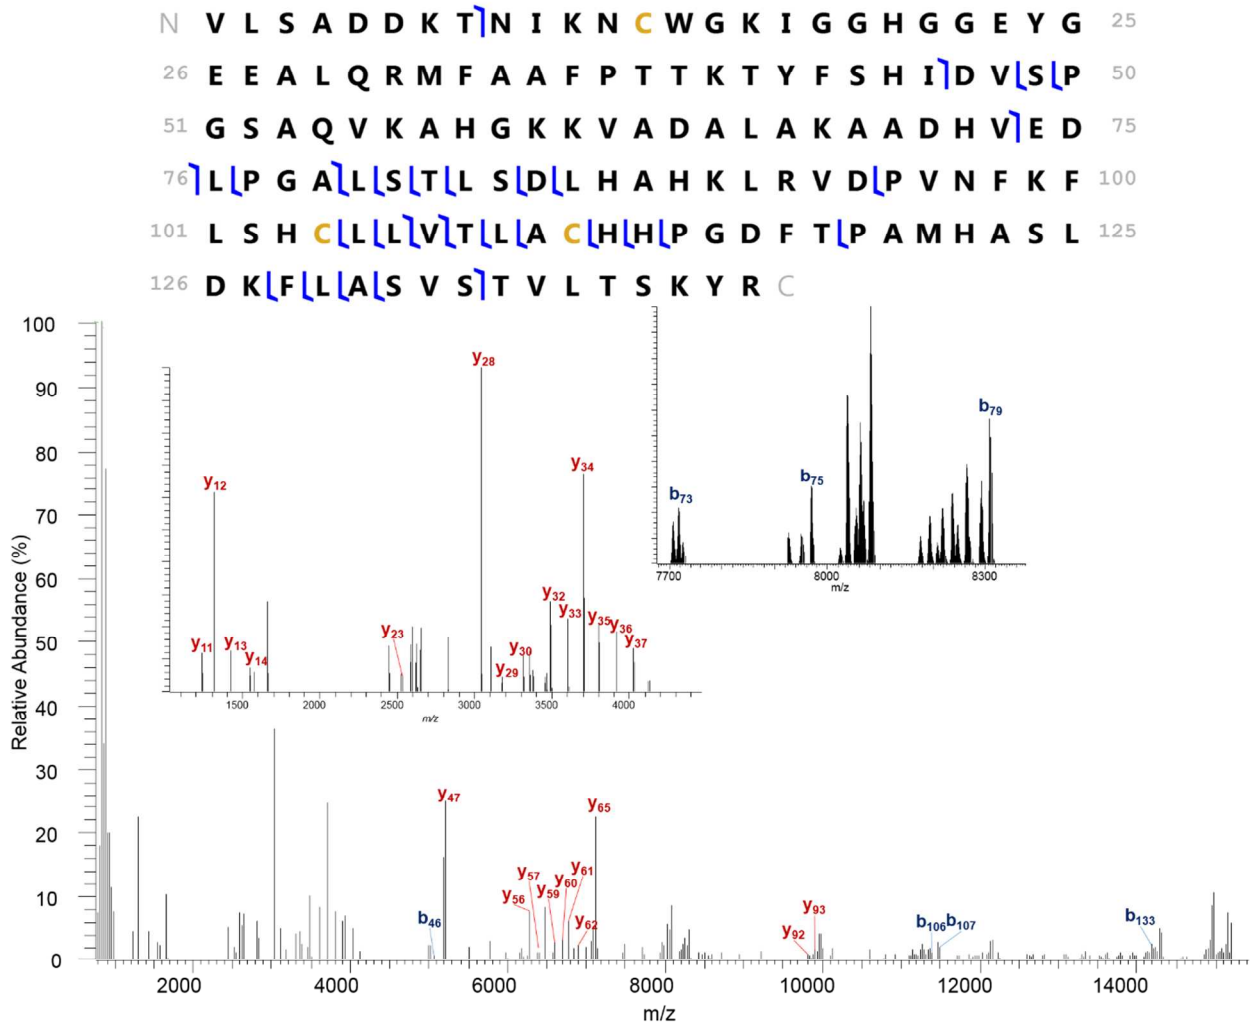

|                            |                |
|----------------------------|----------------|
| <b>PCS</b>                 | <b>157.05</b>  |
| <b>P-score</b>             | <b>8.2E-19</b> |
| <b>Fragments Explained</b> | <b>5%</b>      |
| <b>Residue Cleavages</b>   | <b>21%</b>     |

**Figure S9.** MS/MS of ion cluster at  $m/z$  845.27 from a rat brain tissue section, identified as hemoglobin- $\alpha$  subunit. The sequence coverage map of the fragments compared to the sequence of rat hemoglobin- $\alpha$  subunit is shown, as well as the ProSight Lite scores.

**Table S5.** Matching fragment ions identified from MS/MS of ion  $m/z$  845.27 compared with the sequence of rat hemoglobin- $\alpha$  subunit.

| Name | Ion Type | Theoretical Mass <sup>[a]</sup> | Observed Mass <sup>[a]</sup> | Mass Difference (Da) | Mass Difference (ppm) |
|------|----------|---------------------------------|------------------------------|----------------------|-----------------------|
| B8   | B        | 829.41813                       | 829.4205045                  | 0.002374533          | 2.862890301           |
| B46  | B        | 5069.45919                      | 5069.449327                  | -0.009863467         | -1.94566452           |
| B73  | B        | 7720.87346                      | 7720.873401                  | -5.94669E-05         | -0.007702092          |
| B75  | B        | 7964.94299                      | 7964.929299                  | -0.013691467         | -1.718966087          |
| B79  | B        | 8303.13838                      | 8303.122831                  | -0.015549467         | -1.872721635          |
| B106 | B        | 11387.80784                     | 11387.73042                  | -0.077416467         | -6.798188726          |
| B106 | B        | 11387.80784                     | 11387.78836                  | -0.019476467         | -1.710291142          |
| B107 | B        | 11486.87625                     | 11486.82282                  | -0.053426467         | -4.651087529          |
| B107 | B        | 11486.87625                     | 11486.84714                  | -0.029106467         | -2.533888782          |
| B133 | B        | 14221.17578                     | 14221.08355                  | -0.092226467         | -6.485150616          |
| Y11  | Y        | 1239.682295                     | 1239.680049                  | -0.002246467         | -1.812131132          |
| Y12  | Y        | 1310.719405                     | 1310.717153                  | -0.002252467         | -1.71849663           |
| Y13  | Y        | 1423.803465                     | 1423.801175                  | -0.002290467         | -1.608695959          |
| Y14  | Y        | 1570.871875                     | 1570.870583                  | -0.001292467         | -0.8227704            |
| Y23  | Y        | 2521.336245                     | 2521.331408                  | -0.004837467         | -1.918612359          |
| Y28  | Y        | 3038.553495                     | 3038.549185                  | -0.004310467         | -1.418591737          |
| Y29  | Y        | 3175.612405                     | 3175.606175                  | -0.006230467         | -1.961973341          |
| Y30  | Y        | 3312.671315                     | 3312.66361                   | -0.007705467         | -2.326058383          |
| Y32  | Y        | 3486.717615                     | 3486.712839                  | -0.004776467         | -1.369903562          |
| Y33  | Y        | 3599.801675                     | 3599.801924                  | 0.000248533          | 0.069040781           |
| Y34  | Y        | 3700.849355                     | 3700.844318                  | -0.005037467         | -1.361165073          |
| Y35  | Y        | 3799.917765                     | 3799.915976                  | -0.001789467         | -0.470922528          |
| Y36  | Y        | 3913.001825                     | 3912.995826                  | -0.005999467         | -1.533213413          |
| Y37  | Y        | 4026.085885                     | 4026.080364                  | -0.005521467         | -1.371423025          |
| Y47  | Y        | 5198.665955                     | 5198.648144                  | -0.017811467         | -3.426161064          |
| Y56  | Y        | 6268.280425                     | 6268.262426                  | -0.017999467         | -2.871515896          |
| Y57  | Y        | 6383.307365                     | 6383.292922                  | -0.014443467         | -2.262693312          |
| Y59  | Y        | 6583.423455                     | 6583.364484                  | -0.058971467         | -8.957568548          |
| Y59  | Y        | 6583.423455                     | 6583.367324                  | -0.056131467         | -8.526182049          |
| Y60  | Y        | 6684.471135                     | 6684.446011                  | -0.025124467         | -3.758631965          |
| Y61  | Y        | 6771.503165                     | 6771.466867                  | -0.036298467         | -5.360474033          |
| Y62  | Y        | 6884.587225                     | 6884.570863                  | -0.016362467         | -2.376680888          |
| Y65  | Y        | 7109.698555                     | 7109.6811                    | -0.017455467         | -2.455162725          |
| Y92  | Y        | 9817.139035                     | 9817.106118                  | -0.032917467         | -3.353061087          |
| Y93  | Y        | 9904.171065                     | 9904.124558                  | -0.046507467         | -4.695745517          |

[a] Calculated based on monoisotopic masses

N M Q I F V K T L T G K T I T L E V E **L** P **L** S D T I E N 25  
 26 V K A K I Q D K E G I **L** P P D **Q** Q R L I F A G K Q L 50  
 51 E D **L** G R T L S D **L** Y N I **Q** **L** K **L** E **L** S T L H L V L R L R G 75  
 76 G C

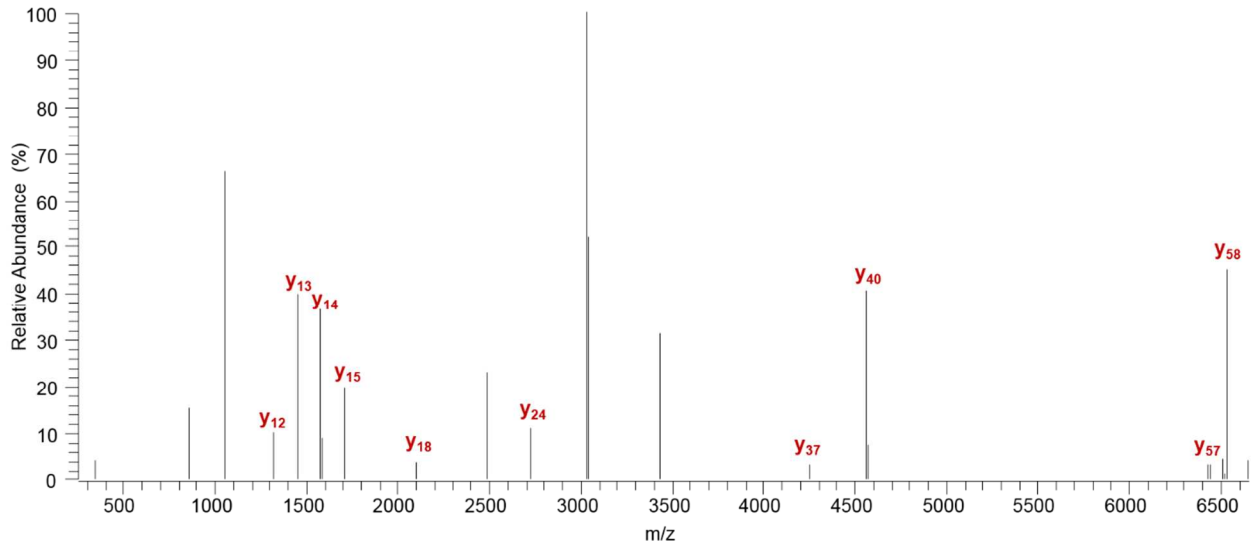

|                     |         |
|---------------------|---------|
| PCS                 | 177.18  |
| P-score             | 1.6E-20 |
| Fragments Explained | 50%     |
| Residue Cleavages   | 13%     |

**Figure S10.** MS/MS of ion cluster at  $m/z$  857. from an ovarian tumor tissue section, identified at ubiquitin. The sequence coverage map of the fragments compared to the sequence of human ubiquitin is shown, as well as the ProSight Lite scores.

**Table S6.** Matching fragment ions identified from MS/MS of ion  $m/z$  952.52 compared with the sequence of rat ubiquitin.

| <b>Name</b> | <b>Ion Type</b> | <b>Theoretical Mass</b> | <b>Observed Mass</b> | <b>Mass Difference (Da)</b> | <b>Mass Difference (ppm)</b> |
|-------------|-----------------|-------------------------|----------------------|-----------------------------|------------------------------|
| Y12         | Y               | 1320.798975             | 1320.79438           | -0.004595                   | -3.47895485                  |
| Y13         | Y               | 1449.841565             | 1449.837092          | -0.004473                   | -3.085164688                 |
| Y14         | Y               | 1577.936525             | 1577.931441          | -0.005084                   | -3.221929348                 |
| Y15         | Y               | 1705.995105             | 1705.989462          | -0.005643                   | -3.307746888                 |
| Y18         | Y               | 2096.185425             | 2096.178877          | -0.006548                   | -3.123769454                 |
| Y24         | Y               | 2725.498705             | 2725.489674          | -0.009031                   | -3.31352203                  |
| Y37         | Y               | 4252.319205             | 4252.303738          | -0.015467                   | -3.637309255                 |
| Y40         | Y               | 4561.451665             | 4561.431493          | -0.020172                   | -4.422276389                 |
| Y57         | Y               | 6430.435985             | 6430.416252          | -0.019733                   | -3.068687729                 |
| Y58         | Y               | 6527.488745             | 6527.462698          | -0.026047                   | -3.990355406                 |



N **S** D **L** **K** **L** P D M A E I **L** E K F D K S K L K K T E T Q E K 25  
 26 N P L P S K E T I E Q E K Q A **L** G E **L** S C

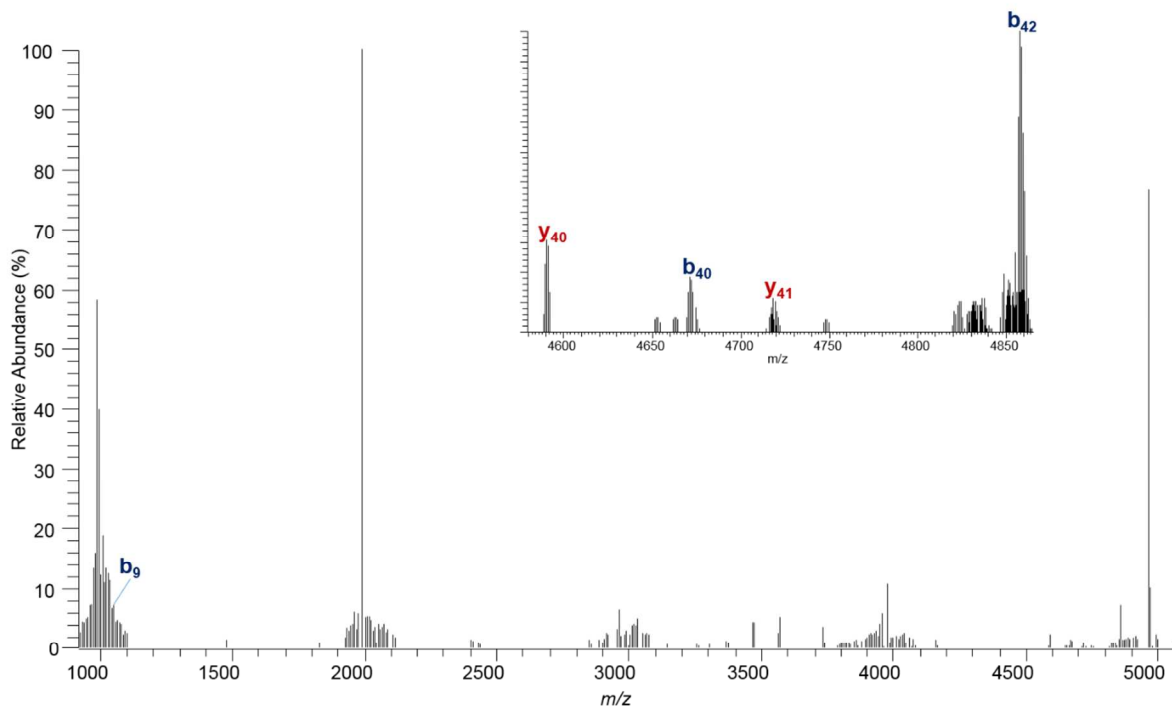

|                     |       |
|---------------------|-------|
| PCS                 | 0.20  |
| P-score             | 0.054 |
| Fragments Explained | 0%    |
| Residue Cleavages   | 12%   |

**Figure S11.** MS/MS of ion cluster at  $m/z$  933.50 from an ovarian tumor tissue section, identified as thymosin  $\beta$ -4. The sequence coverage map of the fragments compared to the sequence of human thymosin  $\beta$ -4 is shown, as well as the ProSight Lite scores. The red highlight indicates an acylation.

**Table S7.** Matching fragment ions identified from MS/MS of ion  $m/z$  933.50 compared with the sequence of human thymosin  $\beta$ -4.

| Name | Ion Type | Theoretical Mass <sup>[a]</sup> | Observed Mass <sup>[a]</sup> | Mass Difference (Da) | Mass Difference (ppm) |
|------|----------|---------------------------------|------------------------------|----------------------|-----------------------|
| B9   | B        | 1028.448445                     | 1028.441021                  | -0.007424            | -7.218640892          |
| B40  | B        | 4669.379595                     | 4669.360756                  | -0.018839            | -4.0345831            |
| B42  | B        | 4855.443645                     | 4855.437948                  | -0.005697            | -1.173322237          |
| Y40  | Y        | 4588.321745                     | 4588.314136                  | -0.007609            | -1.658340549          |
| Y41  | Y        | 4716.416705                     | 4716.418703                  | 0.001998             | 0.423626691           |

[a] Calculated based on monoisotopic masses

N V L S P A D K T N V K A A W G K V G A H A G E Y G 25  
 26 A E A L E R M F L S F P T T K T Y F P H F D L S H 50  
 51 G S A Q V K G H G K K V A D A L T N A V A H V D D 75  
 76 M P N A L S A L L S D L H A H K L R V D P V N F K L 100  
 101 L S H C L L V T L A A H L P A E F T P A V H A S L 125  
 126 D K F L A S V S T V L T S K Y R C

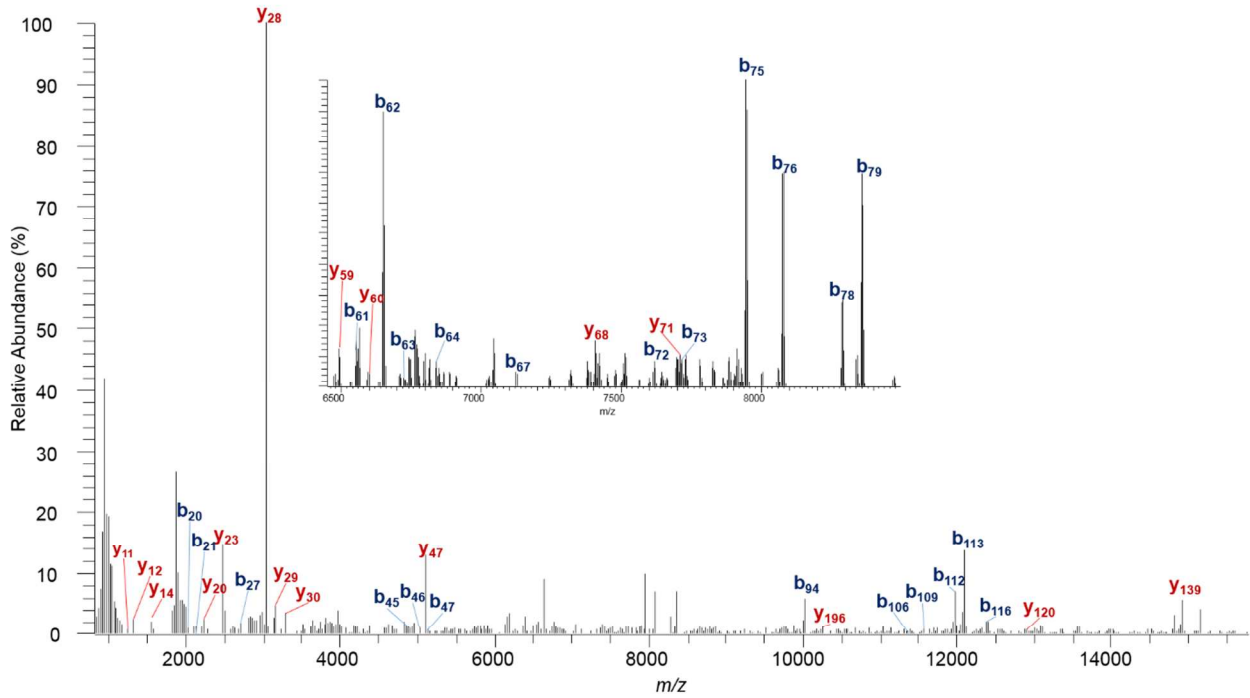

|                     |         |
|---------------------|---------|
| PCS                 | 57.39   |
| P-score             | 6.5E-10 |
| Fragments Explained | 2%      |
| Residue Cleavages   | 26%     |

**Figure S12.** MS/MS of ion cluster at  $m/z$  946.31 from a rat brain tissue section, identified as hemoglobin- $\alpha$  subunit. The sequence coverage map of the fragments compared to the sequence of rat hemoglobin- $\alpha$  subunit is shown, as well as the ProSight Lite scores.

**Table S8.** Matching fragment ions identified from MS/MS of ion  $m/z$  946.31 compared with the sequence of human hemoglobin- $\alpha$  subunit.

| Name | Ion Type | Theoretical Mass | Observed Mass | Mass Difference (Da) | Mass Difference (ppm) |
|------|----------|------------------|---------------|----------------------|-----------------------|
| B20  | B        | 2030.10609       | 2030.103522   | -0.002568            | -1.264958522          |
| B21  | B        | 2101.1432        | 2101.140376   | -0.002824            | -1.34403024           |
| B27  | B        | 2707.37174       | 2707.364201   | -0.007539            | -2.784619448          |
| B45  | B        | 4874.46418       | 4874.459487   | -0.004693            | -0.962772487          |
| B46  | B        | 5021.53259       | 5021.527972   | -0.004618            | -0.919639556          |
| B47  | B        | 5136.55953       | 5136.554839   | -0.004691            | -0.913257205          |
| B61  | B        | 6551.33883       | 6551.353551   | 0.014721             | 2.247021621           |
| B62  | B        | 6650.40724       | 6650.399928   | -0.007312            | -1.099481541          |
| B63  | B        | 6721.44435       | 6721.432335   | -0.012015            | -1.787562222          |
| B64  | B        | 6836.47129       | 6836.453683   | -0.017607            | -2.575451465          |
| B67  | B        | 7121.64014       | 7121.596828   | -0.043312            | -6.081745096          |
| B72  | B        | 7613.88461       | 7613.866762   | -0.017848            | -2.344138494          |
| B73  | B        | 7712.95302       | 7712.936887   | -0.016133            | -2.091676166          |
| B75  | B        | 7943.0069        | 7942.996125   | -0.010775            | -1.356539171          |
| B76  | B        | 8074.04739       | 8074.031671   | -0.015719            | -1.946855058          |
| B78  | B        | 8285.14308       | 8285.151632   | 0.008552             | 1.03220909            |
| B79  | B        | 8356.18019       | 8356.159511   | -0.020679            | -2.474695319          |
| B94  | B        | 10012.09089      | 10012.08605   | -0.00484             | -0.483415507          |
| B106 | B        | 11376.85473      | 11376.81886   | -0.03587             | -3.152892503          |
| B109 | B        | 11690.05488      | 11690.02276   | -0.03212             | -2.747634662          |
| B112 | B        | 11969.18801      | 11969.16292   | -0.02509             | -2.096215714          |
| B113 | B        | 12082.27207      | 12082.26339   | -0.00868             | -0.718407923          |
| B116 | B        | 12379.40453      | 12379.45182   | 0.04729              | 3.820054503           |
| Y11  | Y        | 1239.682295      | 1239.681151   | -0.001144            | -0.922817084          |
| Y12  | Y        | 1310.719405      | 1310.717846   | -0.001559            | -1.189423148          |
| Y14  | Y        | 1570.871875      | 1570.868778   | -0.003097            | -1.971516614          |
| Y20  | Y        | 2222.205885      | 2222.209615   | 0.00373              | 1.67851234            |
| Y23  | Y        | 2489.364165      | 2489.361543   | -0.002622            | -1.053281009          |
| Y28  | Y        | 3034.612715      | 3034.60955    | -0.003165            | -1.042966697          |
| Y29  | Y        | 3147.696775      | 3147.698958   | 0.002183             | 0.693522965           |
| Y30  | Y        | 3284.755685      | 3284.749742   | -0.005943            | -1.809266981          |
| Y47  | Y        | 5104.793895      | 5104.791325   | -0.00257             | -0.503448338          |
| Y56  | Y        | 6174.408365      | 6174.404271   | -0.004094            | -0.66305948           |
| Y58  | Y        | 6376.467335      | 6376.464121   | -0.003214            | -0.504040848          |
| Y59  | Y        | 6489.551395      | 6489.560332   | 0.008937             | 1.377136793           |
| Y60  | Y        | 6560.588505      | 6560.59289    | 0.004385             | 0.66838516            |
| Y61  | Y        | 6647.620535      | 6647.615883   | -0.004652            | -0.699799271          |

|      |   |             |             |           |              |
|------|---|-------------|-------------|-----------|--------------|
| Y68  | Y | 7403.931765 | 7403.925961 | -0.005804 | -0.783907819 |
| Y71  | Y | 7711.096195 | 7711.105709 | 0.009514  | 1.233806421  |
| Y96  | Y | 10242.42061 | 10242.41377 | -0.006835 | -0.667322722 |
| Y120 | Y | 13015.74159 | 13015.74472 | 0.003135  | 0.240862189  |
| Y139 | Y | 14904.73232 | 14904.73395 | 0.001635  | 0.109696704  |

[a] Calculated based on monoisotopic masses

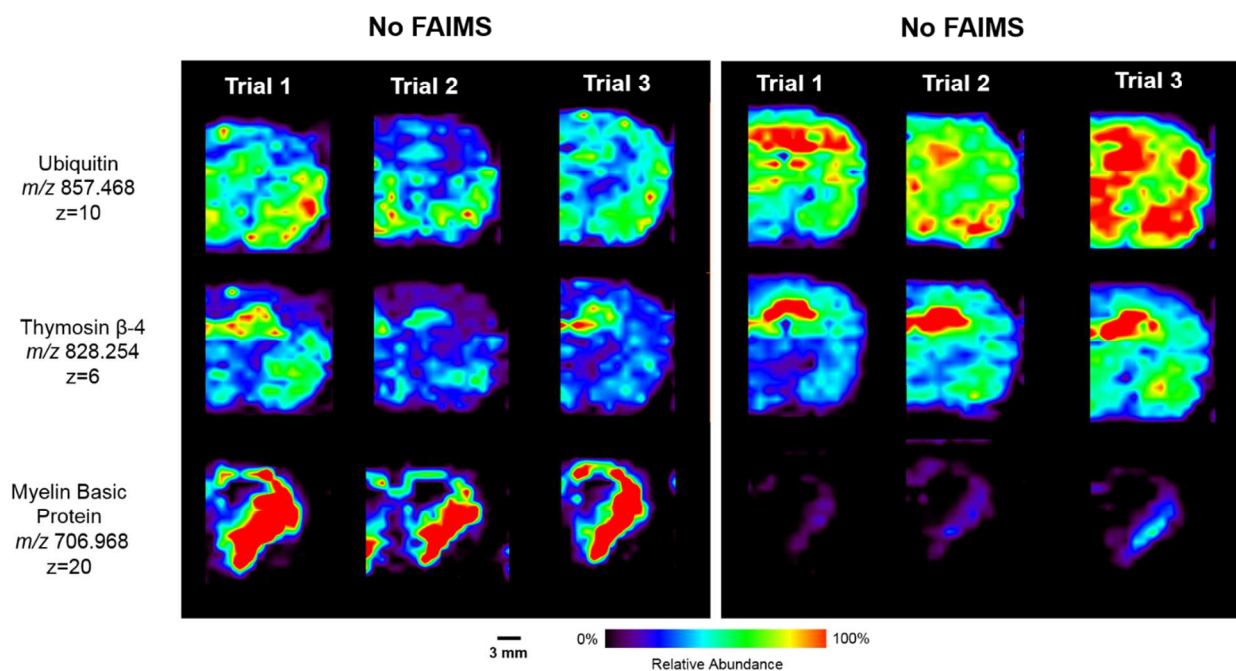

**Figure S13.** Ion images of three representative proteins on replicates (n=3) of serial sections of rat brain tissue half sections to show consistency of ion distribution when using LMJ-SSP and LMJ-SSP-FAIMS.

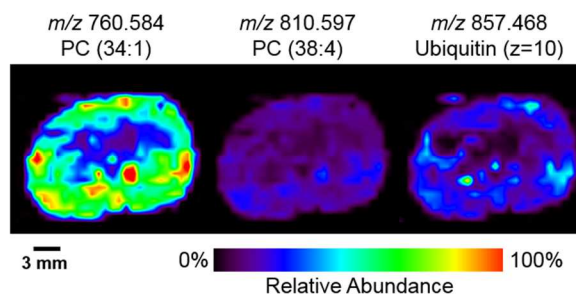

**Figure S14.** LMJ-SSP-FAIMS-MS lipid and protein ion images obtained through selective imaging for proteins.

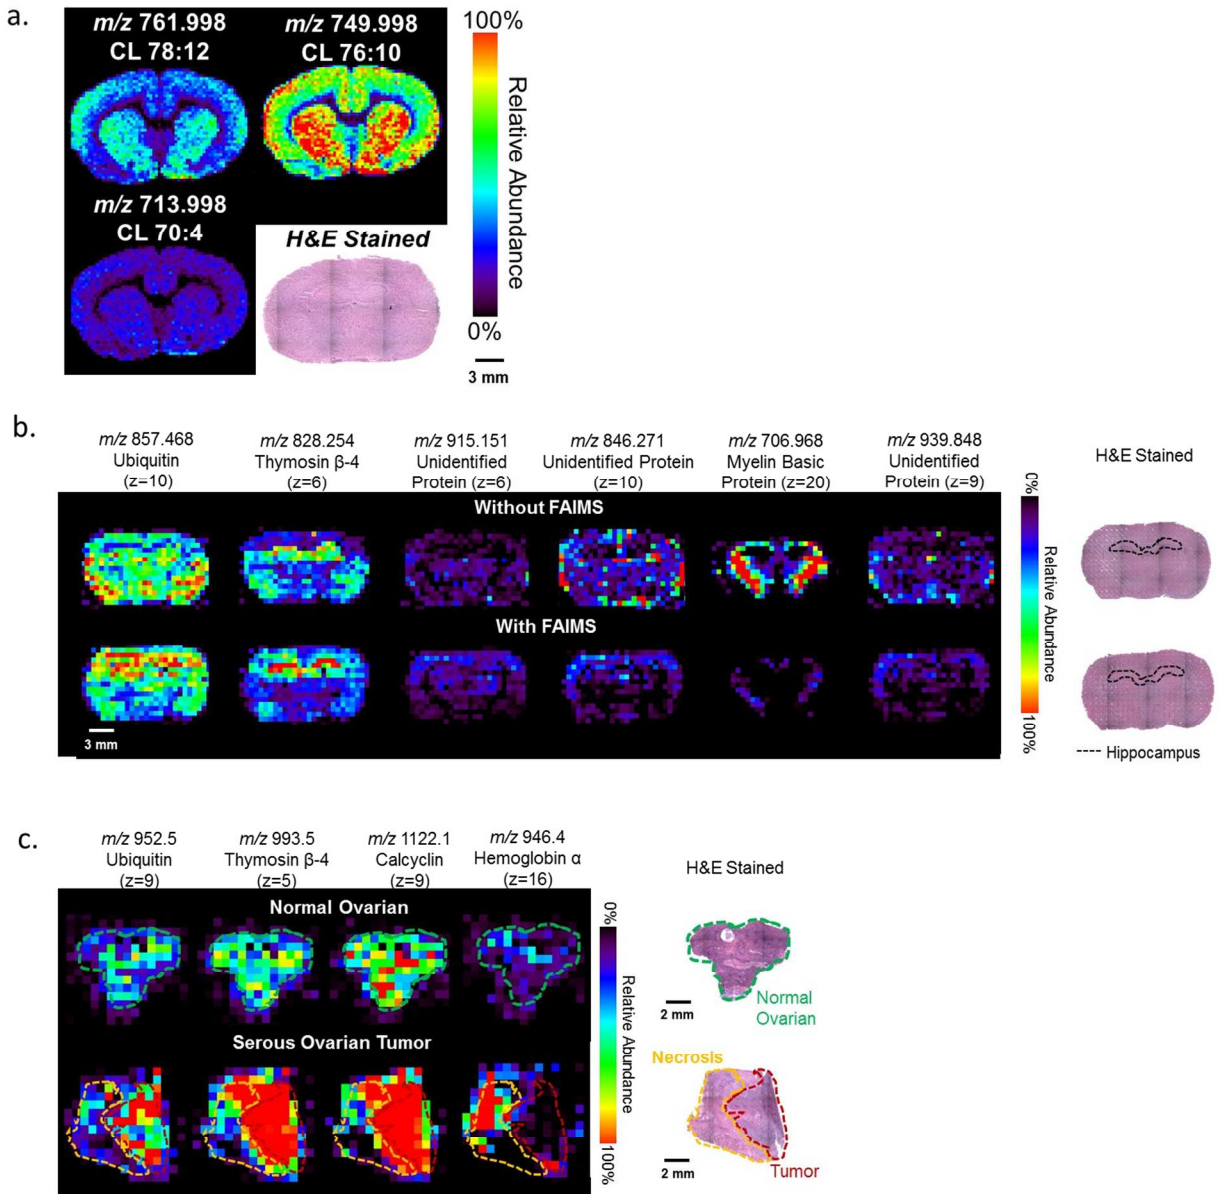

**Figure S15.** Voxel version of ion images displayed in a) Figure 2 (DESI-FAIMS ion images for selected CL species); b) Figure 4 (LMJ-SSP-MS and LMJ-SSP-FAIMS-MS ion images of rat brain tissue for six representative protein species including ubiquitin, thymosin  $\beta$ -4, MBP, and three unidentified proteins); and c) Figure 5 (LMJ-SSP-FAIMS-MS ion images of ubiquitin, thymosin  $\beta$ -4, calcyclin, and hemoglobin  $\alpha$ -subunit for a normal ovarian tissue sample compared with the high grade serous ovarian tumor sample, containing both necrotic and tumor regions).
